# Supplementary material for: Accumulating candidate genes for broad-spectrum resistance to rice blast in a drought-tolerant rice cultivar
Source: PubMed Central journal article supplement (PMC8563964; doi:10.1038/s41598-021-00759-9), 2021-11-02
Supplement: 41598_2021_759_MOESM1_ESM.pdf [file 41598_2021_759_MOESM1_ESM.pdf]

## **Accumulating candidate genes for broad-spectrum resistance to rice blast in a drought-tolerant rice cultivar**

Maria Gay C. Carrillo<sup>1\*</sup>, Federico Martin<sup>2\*</sup>, Mukund Variar<sup>3</sup>, J. C. Bhatt<sup>4</sup>, Alvaro Perez-Quintero<sup>2</sup>, Hei Leung<sup>1</sup>, Jan E. Leach<sup>2</sup>, and Casiana M. Vera Cruz<sup>1</sup>

### **Author Affiliation:**

<sup>1</sup>International Rice Research Institute (IRRI), DAPO Box 7777, Metro Manila, Philippines;

<sup>2</sup>Agricultural Biology, Colorado State University, Fort Collins, CO 80523-1177 USA; <sup>3</sup>Central Rainfed Upland Rice Research Station, PO Box 48, Hazaribag 825 301, India; <sup>4</sup>ICAR-Vivekananda Parvatiya Krishi Anusandhan Sansthan (VPKAS,) Almora, Uttarakhand, India.

### **Co-Corresponding Authors:**

Casiana M. Vera Cruz  
International Rice Research Institute (IRRI)  
DAPO Box 7777, Metro Manila, Philippines  
Phone: +63 (2) 580-5600  
FAX: +63 (2) 580-5699  
E-mail: [C.VeraCruz@irri.org](mailto:C.VeraCruz@irri.org)

Jan E. Leach  
Agricultural Biology,  
307 University Avenue  
Colorado State University,  
Fort Collins, CO 80523-1177 USA  
Phone: +1-970-491-2924  
Email: Jan.Leach@colostate.edu

\* These authors contributed equally to this manuscript.

## Supplementary Materials

Table S1. List of intermated lines derived from BC<sub>3</sub>F<sub>4</sub> progenies of Vandana x Moroberekan used in this study.

Table S2. Candidate genes associated with resistance to rice blast used in this study.

Table S3. SSR markers co-localizing with candidate genes that map to disease resistance QTL and showing polymorphism between Vandana and Moroberekan.

Table S4. Primer sequences for candidate genes used in this study.

Table S5. Correlation coefficients between measured parameters for resistance to blast across screening sites in India and the Philippines.

Table S6. List of simple sequence repeat (SSR) markers used for a genome scan of 114 intermated progenies of Vandana x Moroberekan used in the study.

Table S7. Correlation of SSR markers to trait means for Vandana, Moroberekan and intermated BC<sub>3</sub>F<sub>4</sub> lines screened for resistance to rice blast at multi-location trials in India and the Philippines.

Table S8. SSR markers correlated with resistance to rice blast in India and Philippines that co-localize with known QTL for resistance to biotic stress.

Table S9. Field performance of Vandana, Moroberekan and selected intermated BC<sub>3</sub>F<sub>4</sub> lines screened for resistance to rice blast at multi-location trials in India and the Philippines.

Figure S1. Correlation of disease leaf area at Almora and lesion number at Hazaribag, India on F<sub>4</sub> lines from intermated BC<sub>3</sub>F<sub>4</sub> families. Measurements showed a significantly positive correlation ( $r=0.54^{**}$ ,  $n=80$  2005). LN = Lesion number, DLA = Disease leaf area.

Figure S2. Correlation of Lesion Number (LN) in Ambikapur and lesion number in Hazaribag, India on F<sub>4</sub> lines from intermated BC<sub>3</sub>F<sub>4</sub> families. LN counts at both sites showed a significantly positive correlation ( $r= 0.546^{**}$ ,  $n=80$  2005).

Figure S3. Location of SSR markers and candidate genes (green rectangles) considered in the study. OXLP = GLP.

Figure S4. Diagram representing data from genome-wide scan of parental lines and a selected subset of F<sub>6</sub> intermated lines. Moroberekan (1 - red), and Vandana (2 - blue) genomic regions are shown in three selected lines IR78221-19-6-33-B (3), IR78221-19-6-90-B (4), IR78222-20-7-148-2-B (5) all of which show Resistant phenotype. While most of the genomic background is similar to Vandana, some regions, including QTLs containing CGs, are from Moroberekan. Green regions represent heterozygosity.

Literature Cited in the Supplemental Figures and Tables in Carrillo et al.

**Table S1.** List of intermated<sup>1</sup> lines derived from BC<sub>3</sub>F<sub>4</sub> progenies of Vandana x Moroberekan that were used for this study.

| Code   | Line                 | Cross                  |
|--------|----------------------|------------------------|
| VM-101 | IR78221-19-2-4-2-B   | V4M-14-1-B x V4M-5-3-B |
| VM-102 | IR78221-19-2-4-1-B   | V4M-14-1-B x V4M-5-3-B |
| VM-103 | IR78221-19-2-13-1-B  | V4M-14-1-B x V4M-5-3-B |
| VM-104 | IR78221-19-2-13-2-B  | V4M-14-1-B x V4M-5-3-B |
| VM-105 | IR78221-19-2-14-1-B  | V4M-14-1-B x V4M-5-3-B |
| VM-106 | IR78221-19-2-14-2-B  | V4M-14-1-B x V4M-5-3-B |
| VM-107 | IR78221-19-2-35-B-B  | V4M-14-1-B x V4M-5-3-B |
| VM-108 | IR78221-19-3-104-B   | V4M-14-1-B x V4M-5-3-B |
| VM-109 | IR78221-19-3-196-B   | V4M-14-1-B x V4M-5-3-B |
| VM-110 | IR78221-19-3-222-B   | V4M-14-1-B x V4M-5-3-B |
| VM-111 | IR78221-19-6-6-B     | V4M-14-1-B x V4M-5-3-B |
| VM-112 | IR78221-19-6-15-B    | V4M-14-1-B x V4M-5-3-B |
| VM-113 | IR78221-19-6-16-B    | V4M-14-1-B x V4M-5-3-B |
| VM-114 | IR78221-19-6-89-B    | V4M-14-1-B x V4M-5-3-B |
| VM-115 | IR78221-19-6-94-B    | V4M-14-1-B x V4M-5-3-B |
| VM-116 | IR78221-19-6-99-B    | V4M-14-1-B x V4M-5-3-B |
| VM-167 | IR78221-19-4-43-1-B  | V4M-14-1-B x V4M-5-3-B |
| VM-168 | IR78221-19-4-43-2-B  | V4M-14-1-B x V4M-5-3-B |
| VM-169 | IR78221-19-4-54-B    | V4M-14-1-B x V4M-5-3-B |
| VM-170 | IR78221-19-6-3-B     | V4M-14-1-B x V4M-5-3-B |
| VM-171 | IR78221-19-6-7-B     | V4M-14-1-B x V4M-5-3-B |
| VM-172 | IR78221-19-6-23-B    | V4M-14-1-B x V4M-5-3-B |
| VM-173 | IR78221-19-6-33-B    | V4M-14-1-B x V4M-5-3-B |
| VM-174 | IR78221-19-6-56-B    | V4M-14-1-B x V4M-5-3-B |
| VM-175 | IR78221-19-6-82-B    | V4M-14-1-B x V4M-5-3-B |
| VM-176 | IR78221-19-6-90-B    | V4M-14-1-B x V4M-5-3-B |
| VM-177 | IR78221-19-6-95-B    | V4M-14-1-B x V4M-5-3-B |
| VM-126 | IR78222-20-7-47-B    | V4M-14-1-B x V4M-6-1-B |
| VM-127 | IR78222-20-7-50-1-B  | V4M-14-1-B x V4M-6-1-B |
| VM-128 | IR78222-20-7-50-2-B  | V4M-14-1-B x V4M-6-1-B |
| VM-129 | IR78222-20-7-50-3-B  | V4M-14-1-B x V4M-6-1-B |
| VM-130 | IR78222-20-7-199-1-B | V4M-14-1-B x V4M-6-1-B |
| VM-131 | IR78222-20-7-199-2-B | V4M-14-1-B x V4M-6-1-B |
| VM-132 | IR78222-20-7-199-3-B | V4M-14-1-B x V4M-6-1-B |
| VM-133 | IR78222-20-8-33-1-B  | V4M-14-1-B x V4M-6-1-B |
| VM-134 | IR78222-20-8-33-2-B  | V4M-14-1-B x V4M-6-1-B |
| VM-135 | IR78222-20-8-53-1-B  | V4M-14-1-B x V4M-6-1-B |
| VM-136 | IR78222-20-8-53-2-B  | V4M-14-1-B x V4M-6-1-B |
| VM-137 | IR78222-20-8-116-1-B | V4M-14-1-B x V4M-6-1-B |

<sup>1</sup>The BC<sub>3</sub>F<sub>3</sub> and BC<sub>3</sub>F<sub>4</sub> lines were intermated in all pairwise combinations and advanced to F<sub>6</sub>. At F<sub>6</sub>, 84 progenies were selected based on resistance to blast and morphoagronomic traits similar to Vandana.

**Table S1 continued**

| Code   | Line                 | Cross                   |
|--------|----------------------|-------------------------|
| VM-138 | IR78222-20-8-116-2-B | V4M-14-1-B x V4M-6-1-B  |
| VM-139 | IR78222-20-8-143-1-B | V4M-14-1-B x V4M-6-1-B  |
| VM-140 | IR78222-20-8-143-2-B | V4M-14-1-B x V4M-6-1-B  |
| VM-141 | IR78222-20-8-155-1-B | V4M-14-1-B x V4M-6-1-B  |
| VM-142 | IR78222-20-8-155-2-B | V4M-14-1-B x V4M-6-1-B  |
| VM-143 | IR78222-20-8-155-3-B | V4M-14-1-B x V4M-6-1-B  |
| VM-144 | IR78222-20-8-176-1-B | V4M-14-1-B x V4M-6-1-B  |
| VM-145 | IR78222-20-8-176-2-B | V4M-14-1-B x V4M-6-1-B  |
| VM-146 | IR78222-20-11-62-B   | V4M-14-1-B x V4M-6-1-B  |
| VM-147 | IR78222-20-17-19-1-B | V4M-14-1-B x V4M-6-1-B  |
| VM-148 | IR78222-20-17-19-2-B | V4M-14-1-B x V4M-6-1-B  |
| VM-149 | IR78222-20-21-4-B    | V4M-14-1-B x V4M-6-1-B  |
| VM-150 | IR78222-20-21-71-B   | V4M-14-1-B x V4M-6-1-B  |
| VM-117 | IR78222-20-1A-7-1-B  | V4M-14-1-B x V4M-6-1-B  |
| VM-118 | IR78222-20-1A-7-2-B  | V4M-14-1-B x V4M-6-1-B  |
| VM-119 | IR78222-20-1A-38-1-B | V4M-14-1-B x V4M-6-1-B  |
| VM-120 | IR78222-20-1A-38-2-B | V4M-14-1-B x V4M-6-1-B  |
| VM-121 | IR78222-20-1A-38-3-B | V4M-14-1-B x V4M-6-1-B  |
| VM-122 | IR78222-20-2-36-1-B  | V4M-14-1-B x V4M-6-1-B  |
| VM-123 | IR78222-20-2-36-2-B  | V4M-14-1-B x V4M-6-1-B  |
| VM-124 | IR78222-20-6-154-1-B | V4M-14-1-B x V4M-6-1-B  |
| VM-125 | IR78222-20-6-154-2-B | V4M-14-1-B x V4M-6-1-B  |
| VM-178 | IR78222-20-7-128-B   | V4M-14-1-B x V4M-6-1-B  |
| VM-179 | IR78222-20-7-140-B   | V4M-14-1-B x V4M-6-1-B  |
| VM-180 | IR78222-20-7-148-1-B | V4M-14-1-B x V4M-6-1-B  |
| VM-181 | IR78222-20-7-148-2-B | V4M-14-1-B x V4M-6-1-B  |
| VM-182 | IR78222-20-7-148-3-B | V4M-14-1-B x V4M-6-1-B  |
| VM-183 | IR78222-20-8-118-B   | V4M-14-1-B x V4M-6-1-B  |
| VM-184 | IR78222-20-17-47-B   | V4M-14-1-B x V4M-6-1-B  |
| VM-151 | IR78222-20-23-29-B   | V4M-14-1-B x V4M-6-1-B  |
| VM-152 | IR78224-22-2-2-B     | V4M-14-1-B x V4M-82-2-B |
| VM-153 | IR78224-22-2-4-B     | V4M-14-1-B x V4M-82-2-B |
| VM-154 | IR78224-22-2-15-B    | V4M-14-1-B x V4M-82-2-B |
| VM-155 | IR78224-22-2-24-B    | V4M-14-1-B x V4M-82-2-B |
| VM-156 | IR78224-22-2-36-B    | V4M-14-1-B x V4M-82-2-B |
| VM-157 | IR78224-22-2-50-B    | V4M-14-1-B x V4M-82-2-B |
| VM-158 | IR78224-22-2-59-B    | V4M-14-1-B x V4M-82-2-B |
| VM-159 | IR78224-22-2-60-1-B  | V4M-14-1-B x V4M-82-2-B |
| VM-160 | IR78224-22-2-60-2-B  | V4M-14-1-B x V4M-82-2-B |
| VM-161 | IR78224-22-2-74-B    | V4M-14-1-B x V4M-82-2-B |
| VM-162 | IR78224-22-2-96-B    | V4M-14-1-B x V4M-82-2-B |
| VM-163 | IR78224-22-2-98-B    | V4M-14-1-B x V4M-82-2-B |
| VM-164 | IR78224-22-2-104-B   | V4M-14-1-B x V4M-82-2-B |
| VM-165 | IR78224-22-2-113-B   | V4M-14-1-B x V4M-82-2-B |

VM-166

IR78224-22-2-114-B

V4M-14-1-B x V4M-82-2-B

---

**Table S2** Candidate genes associated with resistance to rice blast used in this study

| Gene                          | Rice loci      | Chr | Bioprocess                                                                               | Functional evidence                                                                                                                   |
|-------------------------------|----------------|-----|------------------------------------------------------------------------------------------|---------------------------------------------------------------------------------------------------------------------------------------|
| 14-3-3                        | LOC_Os02g36974 | 2   | Primary metabolism/<br>cellular signal<br>transduction                                   | Disease resistance QTL <sup>1</sup> ; Induced gene in rice- <i>M. oryzae</i> and rice- <i>X. oryzae</i> interactions <sup>2</sup> .   |
| Aldose reductase              | LOC_Os05g39690 | 5   | Stress response                                                                          | Disease resistance QTL <sup>1</sup> ; Associated with stress tolerance in mature seeds of rice <sup>3</sup>                           |
| Chitinase                     | LOC_Os03g04060 | 2   | Chitin degradation                                                                       | Disease resistance QTL <sup>1</sup> ; Defense response by degrading fungal chitin <sup>4</sup>                                        |
| Heat shock protein 90 (HSP90) | LOC_Os06g50300 | 6   | Stress response                                                                          | Pathogen-induced defense gene and chaperoning role in R-gene mediate resistance <sup>5,6</sup>                                        |
| Oxalate oxidase (OXO)         | LOC_Os03g48750 | 3   | Oxidative burst,<br>signaling, structure                                                 | Gene cluster as a disease resistance QTL <sup>7-10</sup>                                                                              |
|                               | LOC_Os03g48760 | 3   |                                                                                          |                                                                                                                                       |
|                               | LOC_Os03g48770 | 3   |                                                                                          |                                                                                                                                       |
|                               | LOC_Os03g48780 | 3   |                                                                                          |                                                                                                                                       |
| Germin-like proteins (GLP)    | LOC_Os08g08920 | 8   | Strengthening of cell wall during papilla formation in barley-powdery mildew interaction | Gene cluster as a disease resistance QTL <sup>7-9</sup> ; Induced expression in rice- <i>M. oryzae</i> interaction <sup>11,12</sup> . |
|                               | LOC_Os08g08960 | 8   |                                                                                          |                                                                                                                                       |
|                               | LOC_Os08g08970 | 8   |                                                                                          |                                                                                                                                       |
|                               | LOC_Os08g08980 | 8   |                                                                                          |                                                                                                                                       |
|                               | LOC_Os08g08990 | 8   |                                                                                          |                                                                                                                                       |
|                               | LOC_Os08g09000 | 8   |                                                                                          |                                                                                                                                       |
|                               | LOC_Os08g09010 | 8   |                                                                                          |                                                                                                                                       |
|                               | LOC_Os08g09020 | 8   |                                                                                          |                                                                                                                                       |
|                               | LOC_Os08g09040 | 8   |                                                                                          |                                                                                                                                       |
|                               | LOC_Os08g09060 | 8   |                                                                                          |                                                                                                                                       |
|                               | LOC_Os08g09080 | 8   |                                                                                          |                                                                                                                                       |
|                               | LOC_Os08g13440 | 8   |                                                                                          |                                                                                                                                       |
|                               | LOC_Os08g35750 | 8   |                                                                                          |                                                                                                                                       |

| <b>Gene</b>                                                  | <b>Rice loci</b> | <b>Chr</b> | <b>Bioprocess</b>                     | <b>Functional evidence</b>                                                                                                                          |
|--------------------------------------------------------------|------------------|------------|---------------------------------------|-----------------------------------------------------------------------------------------------------------------------------------------------------|
| Pathogenesis related protein 1 (PR1)                         | LOC_Os10g11500   | 10         | Pathogenesis related protein          | Gene cluster as a disease resistance QTL <sup>1</sup> ; Involved in defense response against fungal and bacterial pathogens of plants <sup>13</sup> |
| Pathogenesis related protein 5 (thaumatin-like proteins)/PR5 | LOC_Os06g47600   | 6          | Pathogenesis related protein          | Gene cluster as a disease resistance QTL <sup>7, 8, 9</sup> ; Antifungal activity by binding to beta-1,3-glucans <sup>14,15</sup>                   |
|                                                              | LOC_Os07g23470   | 7          |                                       |                                                                                                                                                     |
|                                                              | LOC_Os12g43380   | 12         |                                       |                                                                                                                                                     |
| Peroxidase                                                   | LOC_Os07g48020   | 7          | Oxidative burst, signaling, structure | Gene cluster as a disease resistance QTL <sup>1</sup> . Involved in defense response to bacterial blight of rice <sup>16</sup>                      |
| Probenazole-induced protein                                  | LOC_Os12g36880   | 12         | Pathogenesis related protein          | Induced expression by probenazole and by <i>M. oryzae</i> <sup>17</sup>                                                                             |
| Putative 2-dehydro-3-deoxyphosphoheptonate aldolase (DHAP)   | LOC_Os07g42960   | 7          | Aromatic amino acid synthesis         | Pathogen-induced defense gene in maize- <i>Puccinia sorghi</i> interaction (Bai et al., unpublished)                                                |



**Table S3** - Primer sequences for candidate genes that were used in this study

| Gene                                                       | Primer name | Chr | Forward Sequence (5'-3') | Reverse Sequence (5'-3') |
|------------------------------------------------------------|-------------|-----|--------------------------|--------------------------|
| 14-3-3                                                     | 14-3-3      | 2   | GCTTTCCCGTGAGGAGAATG     | GCCACCATGGTATTCTCAGC     |
| Aldose reductase                                           | AR          | 5   | TGCTCACTCCGTTTCAGACAG    | CAGGTTCCGCAGCTGTCTAT     |
| Chitinase                                                  | CHI         | 2   | CGTCAAAGCCGGATGTCC       | GCGGTAAACAACGGTACGATC    |
| Heat shock protein 90 (HSP90)                              | HSP90       | 6   | TGGTCACCCTTTGATTGACTC    | AGATGAGCTCCCTCAGGAAA     |
| Oxalate oxidase                                            | OsOxo1      | 3   | CAAACAAAGCCAGCTTGTC      | CCCATAACATGGGAGAAAGTT    |
|                                                            | OsOxo2      | 3   | CCAGCTCGTCACTGCTACTG     | AGCGAAGAACGGTACGAAAA     |
|                                                            | OsOxo3      | 3   | CATAGCTCGATGTGCATGGT     | GCCGACATTGAACTGGAAGT     |
|                                                            | OsOxo4      | 3   | GCCAGGTGCCATTTTCATTAC    | AGTACCCACCGGTGAACTTG     |
| Oxalate oxidase (1 kb upstream)                            | OsOxo1 UP   | 3   | AGCTTGTCCTGCGCTTCTT      | GTGGCAATCTTGGAGGAGAA     |
|                                                            | OsOxo2 UP   | 3   | GCCTCTACGGGGTCTTGACT     | AGCGAAGAACGGTACGAAAA     |
|                                                            | OsOxo3 UP   | 3   | GGACCCTCTCCAGGACTTCT     | CACGGACCACCTTGGAAAT      |
|                                                            | OsOxo4 UP   | 3   | ACCCTGACCCTCTCCAAGAC     | CGGACCACCCTGGAGTAGTA     |
| Germin-like protein                                        | GLP         | 8   | GCAATTAGAACGGTATGAGC     | TCGACGACATTGAACTGGAGG    |
| Pathogenesis related protein 1 (PR1)                       | PR1         | 10  | TTACGCACCCAATTGTAGCA     | TCCCAGAGTCACAAACATCG     |
| Pathogenesis related protein 5 (PR5)                       | PR5_6       | 6   | CAAATTCCACGAATATCCAA     | TACCTGAGGTCCTCCCATCA     |
|                                                            | PR5_7       | 7   | TCTTGGTTGCTTCCGTTCTT     | CGCCTGAAGAGAAATGCAA      |
|                                                            | PR5_12      | 12  | TGGATTCACAAACCACGAAA     | TTGTCTTCGGGGAACAGGTA     |
| Peroxidase                                                 | POX         | 7   | TGATCAGAAGCCATATGTAGC    | ATCAGCTGAGCATCTCATATAAGG |
| Probenazole-induced protein                                | PR10        | 12  | ATGCCAGGTCTCAAATGTC      | TCTCCGTCGAGTGTGACTTG     |
| Putative 2-dehydro-3-deoxyphosphoheptonate aldolase (DHAP) | DHAP        | 7   | GACCGTGTAAGTAATGGGTGGT   | GGCTGAGCAGTCATAGAAGAGG   |

**Table S4** SSR markers co-localizing with candidate genes that map to disease resistance QTL and showing polymorphism between Vandana and Moroberekan

| <b>Candidate Gene</b>       | <b>Chr</b> | <b>cM</b> | <b>SSR Marker<sup>1</sup></b> |
|-----------------------------|------------|-----------|-------------------------------|
| 14-3-3                      | 2          | 88.2      | RM6056, RM5363                |
| Chitinase                   | 2          | 93.2      | RM6379                        |
| Oxalate oxidase             | 3          | 122.8     | RM426, RM504, RM168           |
| Aldose Reductase            | 5          | 95.8      | RM188, RM1187                 |
| PR5 (Thaumatococcus-like)   | 6          | 113.4     | RM340, RM6811                 |
| HSP90                       | 6          | 121.7     | RM176, RM6563, RM1150         |
| PR5 (Thaumatococcus-like)   | 7          | 50        | RM214, RM542                  |
| Putative DHAP               | 7          | 78.9      | RM478, RM234, RM1330          |
| Peroxidase                  | 7          | 115.5     | RM5720                        |
| Germin-like protein         | 8          | 38.5      | RM544, RM310, RM6208, RM547   |
| Germin-like protein         | 8          | 48.8      | RM6429, RM3215,               |
| Germin-like protein         | 8          | 53.7      | RM331, RM126                  |
| PR1b                        | 10         | 15.2      | RM216, RM5348, RM311          |
| Probenazole-induced protein | 12         | 94.7      | RM1015                        |

<sup>1</sup> SSRs were selected based on anchor markers from BAC clones with the candidate gene loci found in [www.gramene.org](http://www.gramene.org). Primer sequences are available at <http://143.48.220.116/microsat/index.html>.

**Table S5.** Correlation coefficients between measured parameters for resistance to blast across screening sites in India and the Philippines

| SSR Marker         | Trait <sup>1,2</sup> |       |                    |                    |                    |                    |                   |                    |                   |                   |
|--------------------|----------------------|-------|--------------------|--------------------|--------------------|--------------------|-------------------|--------------------|-------------------|-------------------|
|                    | India                |       |                    |                    |                    |                    |                   |                    | Philippines       |                   |
|                    | Almora               |       |                    |                    | Hazaribag          |                    | Ambikapur         | IRRI               | Cavinti           |                   |
|                    | LN                   | SB    | DLA                | SD                 | PB                 | YB                 | LB                | PB                 | LB                | SB                |
| <b>India</b>       |                      |       |                    |                    |                    |                    |                   |                    |                   |                   |
| <u>Almora</u>      |                      |       |                    |                    |                    |                    |                   |                    |                   |                   |
| LN                 |                      |       |                    |                    |                    |                    |                   |                    |                   |                   |
| SB                 | 0.05                 |       |                    |                    |                    |                    |                   |                    |                   |                   |
| DLA                | 0.77 <sup>d</sup>    | -0.16 |                    |                    |                    |                    |                   |                    |                   |                   |
| SD                 | -0.49 <sup>d</sup>   | 0.02  | -0.47 <sup>d</sup> |                    |                    |                    |                   |                    |                   |                   |
| PB                 | 0.78 <sup>d</sup>    | 0.03  | 0.79 <sup>d</sup>  | -0.65 <sup>d</sup> |                    |                    |                   |                    |                   |                   |
| YB                 | -0.60 <sup>d</sup>   | -0.06 | -0.60 <sup>d</sup> | 0.62 <sup>d</sup>  | -0.81 <sup>d</sup> |                    |                   |                    |                   |                   |
| <u>Hazaribag</u>   |                      |       |                    |                    |                    |                    |                   |                    |                   |                   |
| LB                 | 0.11                 | -0.02 | 0.14               | -0.11              | 0.15               | -0.32 <sup>b</sup> |                   |                    |                   |                   |
| PB                 | -0.17                | -0.12 | -0.17              | -0.08              | -0.19              | 0.12               | 0.00              |                    |                   |                   |
| <u>Ambikapur</u>   |                      |       |                    |                    |                    |                    |                   |                    |                   |                   |
| LB                 | 0.21                 | -0.04 | 0.20               | -0.10              | 0.23               | -0.25 <sup>a</sup> | 0.28 <sup>a</sup> | -0.18              |                   |                   |
| <b>Philippines</b> |                      |       |                    |                    |                    |                    |                   |                    |                   |                   |
| IRRI               |                      |       |                    |                    |                    |                    |                   |                    |                   |                   |
| SB                 | 0.30 <sup>b</sup>    | 0.20  | 0.20               | -0.26              | 0.37 <sup>b</sup>  | -0.32 <sup>a</sup> | 0.13              | -0.31 <sup>b</sup> | 0.28 <sup>a</sup> |                   |
| <u>Cavinti</u>     |                      |       |                    |                    |                    |                    |                   |                    |                   |                   |
| SB                 | 0.30 <sup>b</sup>    | 0.10  | 0.28               | -0.27              | 0.41 <sup>c</sup>  | -0.35 <sup>b</sup> | 0.16              | -0.29 <sup>a</sup> | 0.34 <sup>b</sup> | 0.95 <sup>d</sup> |

<sup>1</sup> LN = lesion number; SB = seedling blast; DLA = diseased leaf area; SD = start of disease (days after sowing); PB = panicle blast; YB = yield under blast condition; LB = leaf blast

<sup>2</sup> Significance of correlation: a =  $p < 0.05$ ; b =  $p < 0.01$ ; c =  $p < 0.001$ ; d =  $p < 0.0001$

**Table S6.** List of simple sequence repeat (SSR) markers used for a genome scan of 114 intermated progenies of Vandana x Moroberekan that were used in the study.

| Marker | Map              | Chr | Position<br>cM | Motif       | Annealing<br>Tm (°C) | Product<br>Size (bp) | GenBank<br>Accession | References |
|--------|------------------|-----|----------------|-------------|----------------------|----------------------|----------------------|------------|
| RM495  | IRMI 2003        | 1   | 0.3            | (CTG)7      | 55                   | 159                  | AQ573939             | 18         |
| RM84   | CORNELL SSR 2001 | 1   | 26.2           | (TCT)10     | 55                   | 113                  | AF343869             | 19         |
| RM220  | CORNELL SSR 2001 | 1   | 28.4           | (CT)17      | 55                   | 127                  | AF344041             | 19         |
| RM1    | CORNELL SSR 2001 | 1   | 29.7           | (AG)26      | 55                   | 113                  | AF344003             | 20         |
| RM581  | IRMI 2003        | 1   | 49             | (GA)12      | 55                   | 143                  | AP000969             | 18         |
| RM490  | CORNELL SSR 2001 | 1   | 51             | CT)13       | 55                   | 101                  | AQ510019             | 18         |
| RM24   | CORNELL SSR 2001 | 1   | 78.4           | (GA)29      | 55                   | 192                  | AF343841             | 19         |
| RM5    | IRMI 2003        | 1   | 98.5           | (GA)14      | 55                   | 113                  | AF344007             | 20         |
| RM246  | CORNELL SSR 2001 | 1   | 115.2          | (CT)20      | 55                   | 116                  | AF344066             | 19         |
| RM302  | IRMI 2003        | 1   | 135.8          | (GT)30(AT)8 | 55                   | 156                  | AF344127             | 21         |
| RM104  | IRMI 2003        | 1   | 159            | (GA)9       | 55                   | 222                  |                      | 22         |
| RM414  | IRMI 2003        | 1   | 161.5          | (TGCA)6     | 55                   | 223                  | AQ158869             | 18         |
| RM14   | CORNELL SSR 2001 | 1   | 194.1          | (GA)18      | 55                   | 191                  | AF344015             |            |
| RM109  | IRMI 2003        | 2   | 0              | (AG)16      | 55                   | 97                   | D15964               | 21         |
| RM154  | CORNELL SSR 2001 | 2   | 4.8            | (GA)21      | 55                   | 183                  | D39059               | 22         |
| RM452  | CORNELL SSR 2001 | 2   | 58.4           | (GTC)9      | 55                   | 209                  | AQ326476             | 18         |
| RM27   | CORNELL SSR 2001 | 2   | 66             | (GA)7       | 55                   | 158                  | AF343844             | 19         |
| RM561  | CORNELL SSR 2001 | 2   | 74.1           | (GA)11      | 55                   | 190                  | AQ913300             | 18         |
| RM6843 | IRMI 2003        | 2   | 88.2           | (TCT)25     | 55                   | 201                  | AY023517             | 23         |
| RM5363 | IRMI 2003        | 2   | 91.8           | (TC)13      | 55                   | 143                  | AY022038             | 23         |
| RM526  | IRMI 2003        | 2   | 109.3          | (TAAT)5     | 55                   | 240                  | AQ794492             | 18         |
| RM6    | IRMI 2003        | 2   | 125.6          | (AG)16      | 55                   | 163                  | AF344008             | 20         |
| RM530  | IRMI 2003        | 2   | 130.2          | (GA)23      | 55                   | 161                  | AQ840710             | 18         |
| RM213  | IRMI 2003        | 2   | 150.5          | (CT)17      | 55                   | 139                  | AF344034             | 19         |
| RM208  | IRMI 2003        | 2   | 154.1          | (CT)17      | 55                   | 173                  | AF344029             | 19         |

| Marker | Map              | Chr | Position<br>cM | Motif                  | Annealing<br>Tm (°C) | Product<br>Size (bp) | GenBank<br>Accession | References |
|--------|------------------|-----|----------------|------------------------|----------------------|----------------------|----------------------|------------|
| RM60   | CORNELL SSR 2001 | 3   | 0              | (AATT)5AATC<br>T(AATT) | 55                   | 165                  | AF343863             | 19         |
| RM569  | IRMI 2003        | 3   | 9.3            | (GA)30                 | 55                   | 226                  | AQ864658             | 18         |
| RM545  | IRMI 2003        | 3   | 24.7           | (CT)16                 | 55                   | 175                  | AQ916814             | 18         |
| RM517  | CORNELL SSR 2001 | 3   | 42.9           | (CT)15                 | 55                   | 266                  | AQ689735             | 18         |
| RM7    | CORNELL SSR 2001 | 3   | 64             | (GA)19                 | 55                   | 180                  | AF344009             | 20         |
| RM487  | IRMI 2003        | 3   | 87.9           | (AC)10                 | 55                   | 176                  | AQ395854             | 18         |
| RM473  | CORNELL SSR 2001 | 3   | 113.2          | (TCTA)14               | 55                   | 97                   | AQ331312             | 18         |
| RM426  | IRMI 2003        | 3   | 122.3          | (CA)10                 | 55                   | 150                  | AQ259184             | 18         |
| RM168  | IRMI 2003        | 3   | 122.8          | T15(GT)14              | 55                   | 116                  |                      | 24         |
| RM186  | IRMI 2003        | 3   | 127.4          | (CGG)5                 | 61                   | 124                  | D39420               | 21         |
| RM148  | CORNELL SSR 2001 | 3   | 140.7          | (TG)12                 | 55                   | 129                  |                      | 24         |
| RM143  | CORNELL SSR 2001 | 3   | 207.3          | (CGG)7                 | 67                   | 207                  | D78609               | 21         |
| RM130  | CORNELL SSR 2001 | 3   | 208.2          | (GA)10                 | 55                   | 85                   | D40295               | 21         |
| RM85   | CORNELL SSR 2001 | 3   | 231            | (TGG)5(TCT)12          | 55                   | 107                  | AF344087             | 21         |
| RM537  | IRMI 2003        | 4   | 3.1            | (CCG)9                 | 55                   | 236                  | AQ860402             | 18         |
| RM518  | IRMI 2003        | 4   | 7.9            | (TC)15                 | 55                   | 171                  | AQ690034             | 18         |
| RM551  | CORNELL SSR 2001 | 4   | 8.1            | (AG)18                 | 55                   | 192                  | AQ869594             | 18         |
| RM261  | CORNELL SSR 2001 | 4   | 35.4           | C9(CT)8                | 55                   | 125                  | AF344080             | 19         |
| RM185  | CORNELL SSR 2001 | 4   | 50.8           | (AGG)9                 | 61                   | 197                  | D24415               | 21         |
| RM119  | IRMI 2003        | 4   | 62.6           | (GTC)6                 | 67                   | 166                  |                      | 21         |
| RM241  | IRMI 2003        | 4   | 83             | (CT)31                 | 55                   | 138                  | AF344061             | 19         |
| RM3092 | IRMI 2003        | 4   | 85.5           | (AT)49                 | 55                   | 181                  | AY019767             | 23         |
| RM317  | IRMI 2003        | 4   | 96             | (GC)4(GT)18            | 55                   | 155                  | AF344142             | 21         |
| RM159  | IRMI 2003        | 5   | 5.4            | (GA)19                 | 55                   | 248                  | D48905               | 21         |
| RM122  | CORNELL SSR 2001 | 5   | 10.1           | (GA)7A(GA)2A<br>(GA)11 | 55                   | 227                  |                      | 24         |
| RM413  | CORNELL SSR 2001 | 5   | 26.7           | (AG)11                 | 55                   | 79                   | AQ157494             | 18         |

| Marker | Map              | Chr | Position<br>cM | Motif         | Annealing<br>Tm (°C) | Product<br>Size (bp) | GenBank<br>Accession | References |
|--------|------------------|-----|----------------|---------------|----------------------|----------------------|----------------------|------------|
| RM249  | CORNELL SSR 2001 | 5   | 55.6           | (AG)5A2(AG)14 | 55                   | 121                  | AF344069             | 19         |
| RM459  | IRMI 2003        | 5   | 77.4           | (CATC)6       | 55                   | 63                   | AQ327864             | 18         |
| RM188  | IRMI 2003        | 5   | 95.3           | (CA)8         | 61                   | 210                  | D22459               | 21         |
| RM1187 | IRMI 2003        | 5   | 96.1           | (AG)14        | 50                   | 131                  | AY017862             | 23         |
| RM421  | IRMI 2003        | 5   | 101.5          | (AGAT)6       | 55                   | 234                  | AQ255791             | 18         |
| RM178  | IRMI 2003        | 5   | 104.4          | (GA)5(AG)8    | 67                   | 117                  | D49132               | 21         |
| RM26   | IRMI 2003        | 5   | 111.3          | (GA)15        | 55                   | 112                  | AF343843             | 19         |
| RM540  | CORNELL SSR 2001 | 6   | 0              | (AG)16        | 55                   | 172                  | AQ861615             | 18         |
| RM204  | IRMI 2003        | 6   | 12.9           | (CT)44        | 55                   | 169                  | AB026295<br>.001     | 19         |
| RM225  | CORNELL SSR 2001 | 6   | 26.2           | (CT)18        | 55                   | 140                  | AF344046             | 19         |
| RM253  | CORNELL SSR 2001 | 6   | 37             | (GA)25        | 55                   | 135                  |                      | 18         |
| RM549  | IRMI 2003        | 6   | 51.3           | (CCG)9        | 55                   | 148                  | AQ868278             | 18         |
| RM1150 | IRMI 2003        | 6   | 121.7          | (AG)13        | 55                   | 147                  | AY017825             | 23         |
| RM494  | IRMI 2003        | 6   | 124.4          | (AGA)16       | 55                   | 203                  | AQ573378             | 18         |
| RM427  | IRMI 2003        | 7   | 11             | (TG)11        | 55                   | 185                  | AQ271555             | 18         |
| RM2    | CORNELL SSR 2001 | 7   | 36.1           | (GA)2A(GA)13  | 55                   | 150                  | AF344004             | 20         |
| RM214  | IRMI 2003        | 7   | 49.7           | (CT)14        | 55                   | 112                  | APO04305<br>.001     | 19         |
| RM336  | CORNELL SSR 2001 | 7   | 61             | (CTT)18       | 55                   | 154                  | AF344160             | 21         |
| RM182  | CORNELL SSR 2001 | 7   | 61             | (AT)16        | 67                   | 346                  | L10346               | 22         |
| RM10   | CORNELL SSR 2001 | 7   | 63.5           | (GA)15        | 55                   | 159                  | AF344012             | 20         |
| RM1279 | IRMI 2003        | 7   | 75.6           | (AG)17        | 50                   | 182                  | AY017954             | 23         |
| RM3799 | IRMI 2003        | 7   | 75.9           | (GA)19        | 55                   | 189                  | AY020474             | 23         |
| RM234  | IRMI 2003        | 7   | 93.9           | (CT)25        | 55                   | 156                  | AF344054             | 19         |
| RM1330 | IRMI 2003        | 7   | 96.1           | (AG)20        | 55                   | 161                  | AY018005             | 23         |
| RM5720 | IRMI 2003        | 7   | 115.5          | (AAT)22       | 55                   | 196                  | AY022395             | 23         |
| RM248  | IRMI 2003        | 7   | 118            | (CT)25        | 55                   | 102                  | AF344068             | 19         |

| Marker | Map              | Chr | Position cM | Motif                    | Annealing Tm (°C) | Product Size (bp) | GenBank Accession | References |
|--------|------------------|-----|-------------|--------------------------|-------------------|-------------------|-------------------|------------|
| RM408  | IRMI 2003        | 8   | 0.5         | (CT)13                   | 55                | 128               | AQ163658          | 18         |
| RM152  | IRMI 2003        | 8   | 3.3         | (GGC)10                  | 55                | 151               | D22858            | 22         |
| RM38   | IRMI 2003        | 8   | 16.4        | (GA)16                   | 55                | 250               | AF343851          | 19         |
| RM6208 | IRMI 2003        | 8   | 42.9        | (CGG)8                   | 55                | 143               | AY022883          | 23         |
| RM210  | IRMI 2003        | 8   | 53.7        | (CT)23                   | 55                | 140               | AF344031          | 19         |
| RM331  | IRMI 2003        | 8   | 54.3        | [(CTT)4GTT]2<br>(CTT)11  | 55                | 176               | AF344155          | 21         |
| RM547  | CORNELL SSR 2001 | 8   | 58.1        | (ATT)19                  | 55                | 235               | AQ866086          | 18         |
| RM137  | CORNELL SSR 2001 | 8   | 60.9        | (CT)7                    | 55                | 218               | D47598            | 21         |
| RM80   | CORNELL SSR 2001 | 8   | 103.7       | (TCT)25                  | 55                | 142               | AF343865          | 19         |
| RM308  | CORNELL SSR 2001 | 8   | 104.8       | (AT)4-6-<br>(GT)2T2(GT)7 | 55                | 132               | AF344133          | 21         |
| RM281  | IRMI 2003        | 8   | 119.9       | (GA)21                   | 55                | 138               | AF344107          | 21         |
| RM219  | CORNELL SSR 2001 | 9   | 75.6        |                          | 55                |                   |                   | 18         |
| RM257  | CORNELL SSR 2001 | 9   | 75.9        |                          | 55                |                   |                   | 18         |
| RM201  | CORNELL SSR 2001 | 9   | 93.9        | (CT)17                   | 55                | 158               | AF344023          | 19         |
| RM205  | IRMI 2003        | 9   | 96.1        | (CT)25                   | 55                | 122               | AF344026          | 19         |
| RM215  | IRMI 2003        | 9   | 115.5       | (CT)16                   | 55                | 148               | AF344036          | 19         |
| RM245  | IRMI 2003        | 9   | 118         |                          | 55                |                   |                   | 23         |
| RM222  | IRMI 2003        | 10  | 0.5         | (CT)18                   | 55                | 213               | AF344043          | 19         |
| RM2504 | IRMI 2003        | 10  | 3.3         | (AT)28                   | 55                | 184               | AY019179          | 23         |
| RM5348 | IRMI 2003        | 10  | 16.4        | (TC)13                   | 55                | 183               | AY022023          | 23         |
| RM216  | IRMI 2003        | 10  | 42.9        | (CT)18                   | 55                | 146               | AF344037          | 19         |
| RM171  | IRMI 2003        | 10  | 48.8        | (GATG)5                  | 55                | 328               | D84275            | 22         |
| RM229  | CORNELL SSR 2001 | 10  | 58.1        | (TC)11(CT)5C3<br>(CT)5   | 55                | 116               | AF344049          | 19         |
| RM457  | IRMI 2003        | 11  | 52.2        | (TTAA)5                  | 55                | 228               | AQ327602          | 18         |
| RM21   | IRMI 2003        | 11  | 53.7        | (GA)18                   | 55                | 157               | AF344021          | 20         |

**Table S7.** Correlation of SSR markers to trait means for Vandana, Moroberekan and intermated BC<sub>3</sub>F<sub>4</sub> lines screened for resistance to rice blast at multi-location trials in India and the Philippines.

| SSR Marker | Chr | cM    | Trait <sup>1,2</sup> |                   |                    |                    |                    |                    |                    |                    |                   |                    |                    |  |
|------------|-----|-------|----------------------|-------------------|--------------------|--------------------|--------------------|--------------------|--------------------|--------------------|-------------------|--------------------|--------------------|--|
|            |     |       | India                |                   |                    |                    |                    |                    |                    |                    | Philippines       |                    |                    |  |
|            |     |       | <u>Almora</u>        |                   |                    |                    | <u>Hazaribag</u>   |                    | <u>Ambikapur</u>   |                    | <u>IRRI</u>       | <u>Cavinti</u>     |                    |  |
|            |     |       | LN                   | SB                | DLA                | SD                 | PB                 | YB                 | LB                 | PB                 | LB                | SB                 | SB                 |  |
| RM109      | 2   | 0     | -                    | -                 | -                  | -                  | 0.30 <sup>b</sup>  | -0.34 <sup>b</sup> | 0.17               | -0.13              | 0.06              | 0.52 <sup>d</sup>  | 0.50 <sup>d</sup>  |  |
| RM154      | 2   | 4.8   | -                    | -                 | -                  | -0.26 <sup>a</sup> | -                  | -                  | -                  | -                  | -                 | -                  | -                  |  |
| RM452      | 2   | 58.4  | 0.36 <sup>c</sup>    | 0.42 <sup>c</sup> | 0.31 <sup>b</sup>  | -0.26 <sup>a</sup> | 0.46 <sup>d</sup>  | -0.46 <sup>c</sup> | -                  | -                  | -                 | 0.34 <sup>c</sup>  | 0.34 <sup>b</sup>  |  |
| RM545      | 3   | 24.7  | 0.26 <sup>a</sup>    | -                 | -                  | -                  | -                  | -                  | -0.25 <sup>a</sup> | -                  | -                 | 0.28 <sup>a</sup>  | -                  |  |
| RM517      | 3   | 42.9  | -                    | -                 | 0.26 <sup>a</sup>  | -                  | 0.38 <sup>b</sup>  | -0.28 <sup>a</sup> | -                  | -                  | -                 | -                  | 0.25 <sup>a</sup>  |  |
| RM473D     | 3   | 113.2 | -0.35 <sup>b</sup>   | 0.32 <sup>b</sup> | -0.29 <sup>b</sup> | 0.37 <sup>c</sup>  | -0.53 <sup>d</sup> | 0.55 <sup>d</sup>  | -                  | -                  | -                 | -0.32 <sup>b</sup> | -0.31 <sup>b</sup> |  |
| RM426      | 3   | 122.3 | -                    | 0.32 <sup>b</sup> | -                  | -                  | 0.26 <sup>a</sup>  | -0.28 <sup>a</sup> | -                  | -0.26 <sup>a</sup> | -                 | 0.32 <sup>b</sup>  | 0.31 <sup>b</sup>  |  |
| RM168      | 3   | 122.8 | 0.34 <sup>c</sup>    | -                 | 0.36 <sup>c</sup>  | -0.31 <sup>b</sup> | 0.52 <sup>d</sup>  | -0.44 <sup>c</sup> | -                  | -                  | -                 | 0.25 <sup>a</sup>  | 0.25 <sup>a</sup>  |  |
| RM186      | 3   | 127.4 | 0.26 <sup>a</sup>    | -                 | 0.25 <sup>a</sup>  | -0.29 <sup>a</sup> | 0.25 <sup>a</sup>  | -0.38 <sup>b</sup> | 0.35 <sup>c</sup>  | -                  | 0.30 <sup>b</sup> | 0.26 <sup>a</sup>  | 0.33 <sup>b</sup>  |  |
| RM143      | 3   | 207.3 | -0.28 <sup>a</sup>   | 0.25 <sup>a</sup> | -0.33 <sup>a</sup> | -                  | -                  | 0.26 <sup>a</sup>  | -                  | -                  | -                 | -                  | -                  |  |
| RM85       | 3   | 231   | 0.29 <sup>a</sup>    | -                 | -                  | -0.25 <sup>a</sup> | 0.37 <sup>b</sup>  | -0.32 <sup>b</sup> | -                  | -                  | -                 | 0.29 <sup>a</sup>  | 0.30 <sup>b</sup>  |  |
| RM413      | 5   | 26.7  | -                    | -                 | -                  | -                  | -                  | -                  | -                  | -                  | -                 | -0.25 <sup>a</sup> | -                  |  |
| RM421      | 5   | 101.5 | 0.30 <sup>a</sup>    | -                 | 0.28 <sup>a</sup>  | -0.27 <sup>a</sup> | 0.41 <sup>c</sup>  | -0.33 <sup>b</sup> | -                  | -                  | -                 | -                  | -                  |  |
| RM178      | 5   | 104.4 | -                    | -                 | -                  | -                  | 0.33 <sup>b</sup>  | -0.34 <sup>b</sup> | -                  | -                  | -                 | -                  | -                  |  |
| RM26       | 5   | 111.3 | -                    | -                 | 0.33 <sup>b</sup>  | -                  | -                  | -                  | -                  | -                  | -                 | -                  | -                  |  |
| RM2        | 7   | 36.1  | 0.33 <sup>b</sup>    | 0.35 <sup>c</sup> | 0.26 <sup>a</sup>  | 0.39 <sup>c</sup>  | 0.46 <sup>c</sup>  | -0.43 <sup>c</sup> | -                  | -                  | -                 | 0.39 <sup>b</sup>  | 0.37 <sup>b</sup>  |  |
| RM1330     | 7   | 96.1  | -                    | -                 | -                  | -                  | -                  | -                  | -                  | 0.31 <sup>b</sup>  | -                 | -                  | -                  |  |
| RM408      | 7   | 118.0 | 0.32 <sup>b</sup>    | -                 | 0.31 <sup>b</sup>  | -0.29 <sup>b</sup> | 0.48 <sup>d</sup>  | -0.52 <sup>d</sup> | -                  | -                  | -                 | 0.24 <sup>a</sup>  | 0.25 <sup>a</sup>  |  |
| RM152      | 8   | 3.3   | 0.28 <sup>a</sup>    | 0.33 <sup>b</sup> | -0.29 <sup>b</sup> | -0.29 <sup>a</sup> | 0.37 <sup>b</sup>  | -0.45 <sup>c</sup> | -                  | -                  | -                 | 0.37 <sup>c</sup>  | 0.37 <sup>c</sup>  |  |
| RM3215     | 8   | 49.5  | -                    | -                 | -                  | -                  | -                  | -                  | -                  | -                  | -                 | -                  | -0.25 <sup>a</sup> |  |



**Table S7** (continued)

| SSR<br>Marker | Chr | cM    | Trait <sup>1,2</sup> |                   |                   |                    |                   |                    |           |                    |                   |                   |                    |   |
|---------------|-----|-------|----------------------|-------------------|-------------------|--------------------|-------------------|--------------------|-----------|--------------------|-------------------|-------------------|--------------------|---|
|               |     |       | India                |                   |                   |                    |                   |                    |           |                    |                   | Philippines       |                    |   |
|               |     |       | Almora               |                   |                   |                    |                   |                    | Hazaribag |                    | Ambikapur         | IRRI              | Cavinti            |   |
|               |     |       | LN                   | SB                | DLA               | SD                 | PB                | YB                 | LB        | PB                 | LB                | SB                | SB                 |   |
| RM25          | 8   | 52.2  | -                    | -                 | 0.25 <sup>a</sup> | -0.25 <sup>a</sup> | -                 | -                  | -         | -                  | -                 | -                 | -                  | - |
| RM331         | 8   | 54.3  | -                    | -                 | -                 | -                  | -                 | -                  | -         | -0.55 <sup>d</sup> | -                 | -                 | -                  | - |
| RM137         | 8   | 58.1  | -                    | -                 | -                 | -                  | -                 | -                  | -         | -                  | 0.35 <sup>b</sup> | -                 | -                  | - |
| RM547         | 8   | 58.1  | -                    | -                 | -                 | -                  | -                 | -0.30 <sup>a</sup> | -         | -                  | -                 | -                 | -                  | - |
| RM308         | 8   | 104.7 | -                    | -                 | -                 | -                  | -                 | -                  | -         | -0.26 <sup>a</sup> | -                 | 0.26 <sup>a</sup> | -0.26 <sup>a</sup> | - |
| RM281         | 8   | 119.9 | 0.27 <sup>a</sup>    | 0.27 <sup>a</sup> | 0.27 <sup>a</sup> | -                  | 0.43 <sup>c</sup> | -0.43 <sup>c</sup> | -         | -                  | -                 | 0.26 <sup>a</sup> | 0.27 <sup>a</sup>  | - |

<sup>1</sup>LN = lesion number; SB = seedling blast; DLA = diseased leaf area; SD = start of disease (days after sowing); PB = panicle blast; YB = yield under blast condition; LB = leaf blast

<sup>2</sup>Significance of correlation is: a =  $p < 0.05$ ; b =  $p < 0.01$ ; c =  $p < 0.001$ ; d =  $p < 0.0001$

**Table S8.** SSR markers correlated with resistance to rice blast in India and the Philippines that co-localize with known QTL for resistance to biotic stress<sup>1</sup>.

| Marker | Chr | cM    | BB | RB | BPH | SB | References |
|--------|-----|-------|----|----|-----|----|------------|
| RM109  | 2   | 0     | X  | X  |     |    | 1,25       |
| RM154  | 2   | 4.8   | X  | X  |     |    | 1          |
| RM452  | 2   | 58.4  |    |    |     | X  | 26         |
| RM545  | 3   | 24.7  |    | X  | X   |    | 1,26 2     |
| RM517  | 3   | 42.9  |    | X  | X   |    | 2,26       |
| RM473D | 3   | 113.2 |    |    |     |    | 1          |
| RM143  | 3   | 207.3 |    |    |     | X  | 27         |
| RM85   | 3   | 231   |    |    |     |    | 1          |
| RM413  | 5   | 26.7  |    | X  |     |    | 1,28       |
| RM421  | 5   | 101.5 |    | X  |     | X  | 25,29      |
| RM178  | 5   | 104.4 |    |    |     | X  | 29         |
| RM2    | 7   | 36.1  |    | X  |     |    | 25,30      |
| RM408  | 7   | 118.0 |    | X  |     | X  | 27,30      |
| RM152  | 8   | 3.3   |    | X  |     | X  | 28,30,31   |
| RM3215 | 8   | 49.5  |    | X  | X   | X  | 28,30,31   |
| RM25   | 8   | 52.2  | X  | X  | X   | X  | 1,28,30-32 |
| RM331  | 8   | 54.3  | X  | X  |     | X  | 1,28,30-32 |
| RM137  | 8   | 58.1  | X  | X  |     | X  | 1,28,30-32 |
| RM547  | 8   | 58.1  | X  | X  |     | X  | 1,28,30,32 |
| RM308  | 8   | 104.7 |    |    | X   |    | 33         |
| RM281  | 8   | 119.9 | X  |    | X   |    | 1,26,32    |

<sup>1</sup> BB = bacterial blight; RB = rice blast; BPH = brown plant hopper; SB = sheath blight

**Table S9.** Field performance of Vandana, Moroberekan and selected intermated BC<sub>3</sub>F<sub>4</sub> lines screened for resistance to rice blast at multi-location trials in India and the Philippines.

| Line                 | Trait/Location |     |      |    |     |       |           |      |           |             |         |
|----------------------|----------------|-----|------|----|-----|-------|-----------|------|-----------|-------------|---------|
|                      | India          |     |      |    |     |       |           |      |           | Philippines |         |
|                      | Almora         |     |      |    |     |       | Hazaribag |      | Ambikapur | IRRI        | Cavinti |
|                      | LN             | SB  | DLA  | SD | PB  | YB    | LB        | PB   | LB        | SB          | SB      |
| Moroberekan          | 0.70           | 3.5 | 1.5  | 20 | 3.2 | -     | 0         | 0    | 1.5       | 1.0         | 1.0     |
| IR78221-19-6-7-B-B   | 1.1            | 2.5 | 1.0  | 25 | 3.3 | 15.35 | 2.0       | 20.8 | 4.0       | 1.0         | 1.0     |
| IR78221-19-6-33-B-B  | 1.4            | 5.0 | 2.0  | 15 | 3.9 | 105.0 | 2.0       | 2.4  | 4.0       | 1.0         | 1.0     |
| IR78221-19-4-54-B-B  | 1.2            | 4.5 | 1.5  | 15 | 3.5 | 152.5 | 2.0       | 51.3 | 2.0       | 1.0         | 1.0     |
| IR78221-19-6-56-B-B  | 0.9            | 4.0 | 1.0  | 25 | 3.1 | 80.0  | 2.0       | 1.3  | 2.5       | 1.0         | 1.0     |
| IR78221-19-6-82-B-B  | 0.5            | 3.0 | 1.0  | 20 | 3.4 | 165.0 | 2.0       | 7.5  | 1.0       | 1.0         | 1.0     |
| IR78221-19-6-90-B-B  | 0.3            | 6.0 | 1.0  | 20 | 3.0 | 112.5 | 3.0       | 5.0  | 2.5       | 1.0         | 1.0     |
| IR78221-19-6-99-B-B  | 0.9            | 6.0 | 1.0  | 25 | 3.3 | 170.5 | 2.0       | 10.2 | 4.0       | 1.0         | 1.0     |
| IR78222-20-7-148-2-B | 1.2            | 5.0 | 1.5  | 20 | 5.1 | 70.5  | 2.0       | 3.0  | 4.0       | 4.0         | 4.0     |
| IR78221-19-3-196     | 2.4            | 2.5 | 57.5 | 15 | 8.3 | 5.0   | 3.0       | 10.0 | 4.0       | 4.0         | 4.0     |
| Vandana              | 3.3            | 8.5 | 65.0 | 15 | 8.3 | 5.0   | 4.0       | 10.0 | 5.0       | 7.0         | 8.0     |

LN = lesion number; SB = seedling blast (Scale 0-9); DLA = % diseased leaf area; SD = start of disease (days after sowing); PB = panicle blast (Scale 0-9); YB = yield under blast condition (grams/plot); LB = Leaf blast

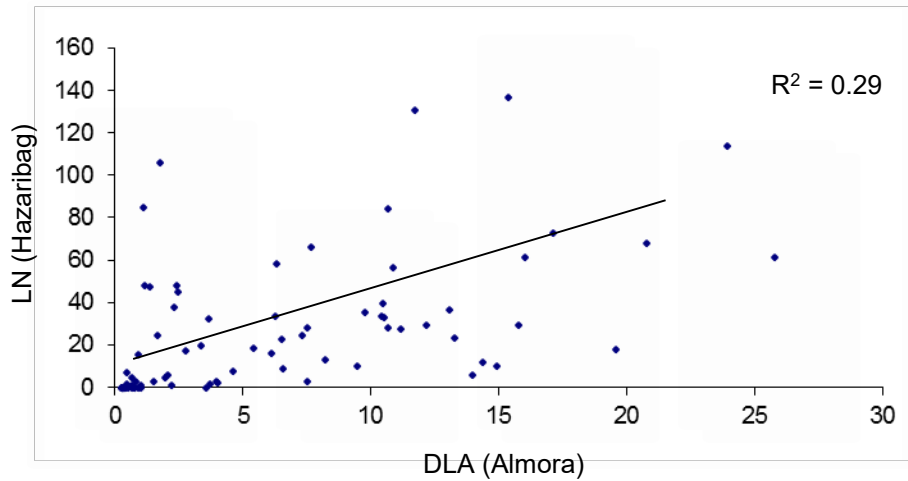

**Fig. S1.** Correlation of disease leaf area at Almora and lesion number at Hazaribag, India on  $F_4$  lines from intermated  $BC_3F_4$  families. Measurements showed a positive correlation ( $r = 0.54^{**}$ ,  $n = 80$  2005). LN = Lesion number, DLA = Disease leaf area.

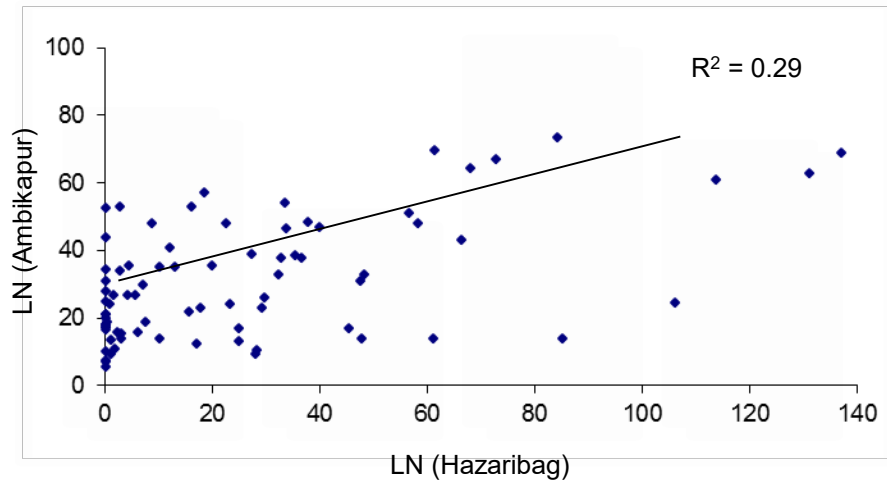

**Figure S2.** Correlation of Lesion Number (LN) in Ambikapur and lesion number in Hazaribag, India on F<sub>4</sub> lines from intermated BC<sub>3</sub>F<sub>4</sub> families. LN counts at both sites showed a significantly positive correlation ( $r= 0.546^{**}$ ,  $n=80$  2005).

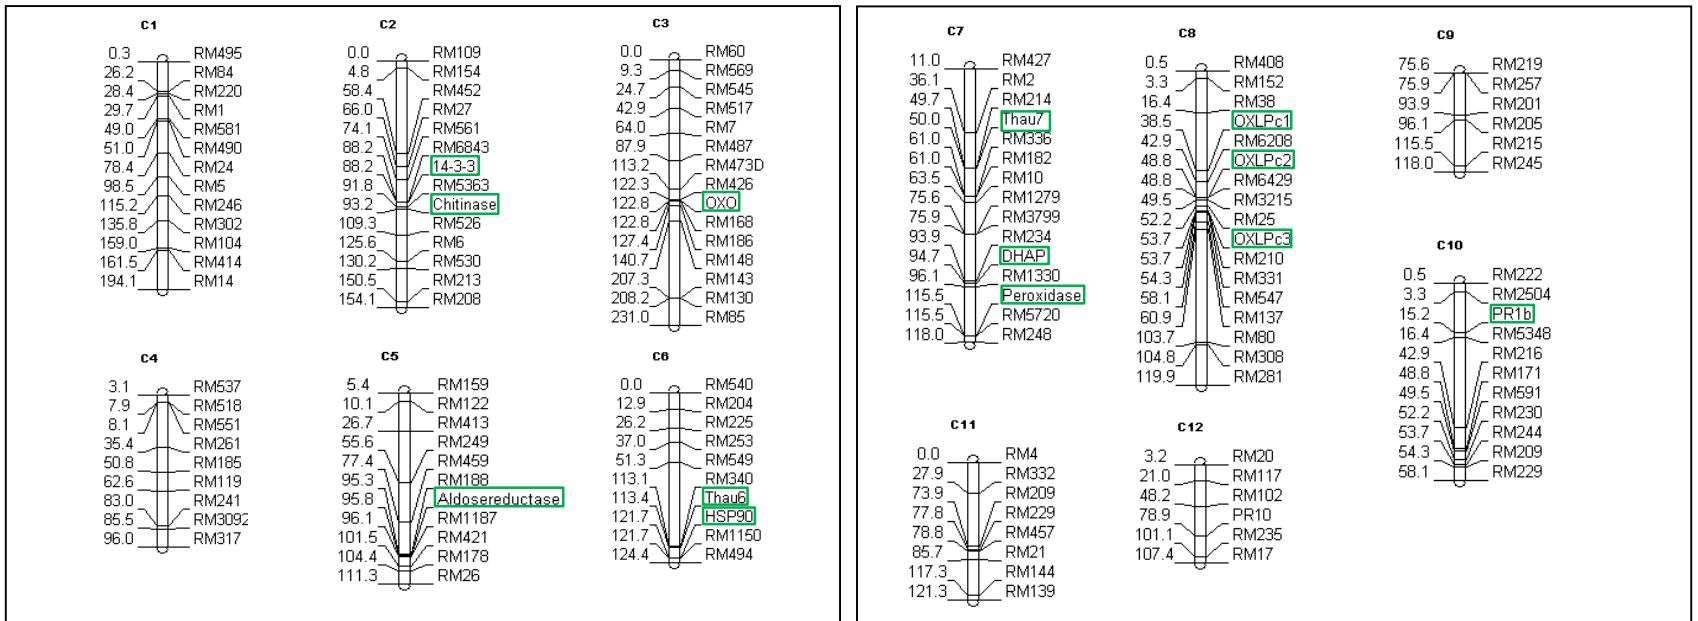

**Figure S3.** Location of SSR markers and candidate genes (green rectangles) considered in the study. OXLP = GLP.

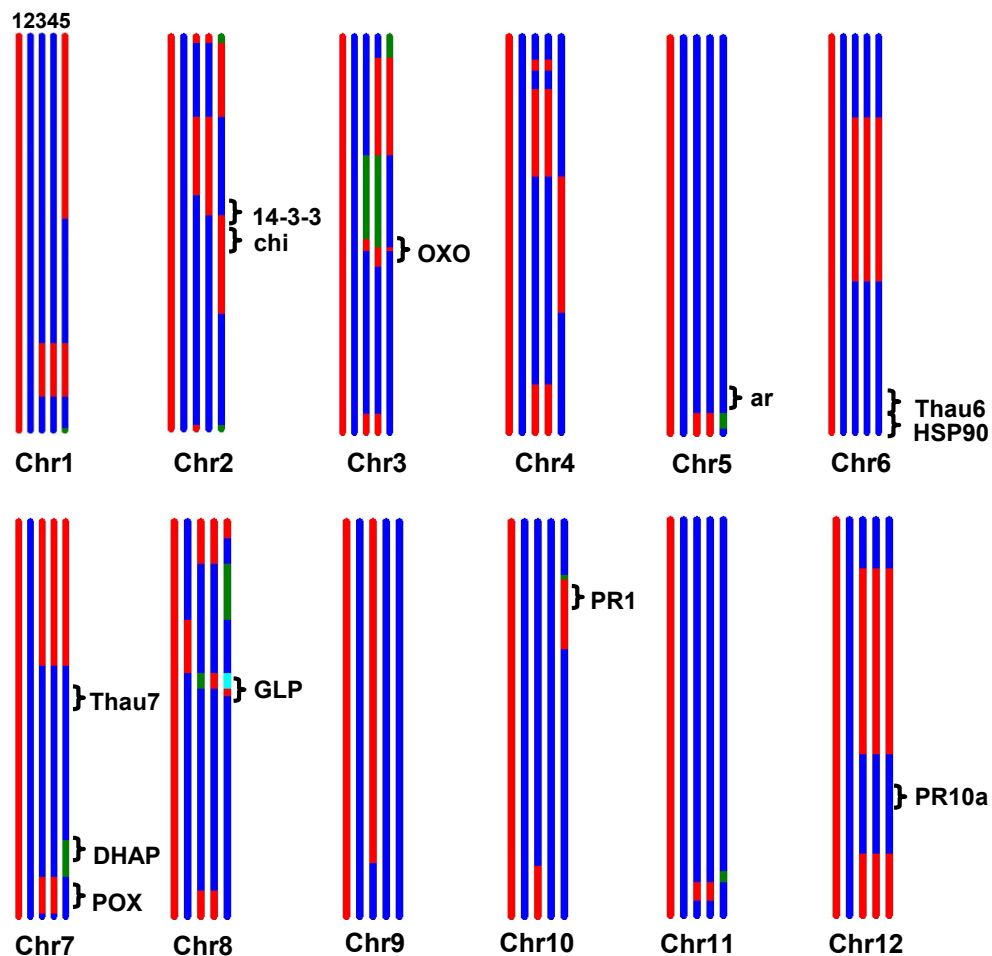

**Figure S4.** Diagram representing data from genome-wide scan of parental lines and a selected subset of F<sub>6</sub> intermated lines. Moroberekan (1- red), and Vandana (2 – blue) genomic regions are shown in three selected lines IR78221-19-6-33-B (3), IR78221-19-6-90-B (4), IR78222-20-7-148-2-B (5) all of which show Resistant phenotype. While most of the genomic background is similar to Vandana, some regions, including QTLs containing CGs, are from Moroberekan. Green regions represent heterozygosity.

## Literature Cited in the Supplemental Documents

- 1 Ramalingam, J. *et al.* Candidate defense genes from rice, barley, and maize and their association with qualitative and quantitative resistance in rice. *Mol Plant Microbe Interact* **16**, 14-24 (2003).
- 2 Chen, F., Li, Q., Sun, L. & He, Z. The rice 14-3-3 gene family and its involvement in responses to biotic and abiotic stress. *DNA Res* **13**, 53 (2006).
- 3 Karuna Sree, B., Rajendrakumar Chadalavada, S. V. & Reddy, A. R. Aldose reductase in rice (*Oryza sativa* L.): stress response and developmental specificity. *Plant Sci.* **160**, 149-157 (2009).
- 4 Bishop, J. G., Dean, A. M. & Mitchell-Olds, T. Rapid evolution in plant chitinases: molecular targets of selection in plant-pathogen coevolution. *Proc Natl Acad Sci U S A* **97**, 5322-5327 (2000).
- 5 Takahashi, A. *et al.* Hyperphosphorylation of a mitochondrial protein, prohibitin, is induced by calyculin A in a rice lesion-mimic mutant *cdr1*. *Plant Physiol* **132**, 1861-1869, doi:10.1104/pp.103.021733 (2003).
- 6 de la Fuente, S. *et al.* Heat shock protein 90 and its co-chaperone protein phosphatase 5 interact with distinct regions of the tomato I-2 disease resistance protein. *Plant J* **43**, 284-298, doi:10.1111/j.1365-313X.2005.02450.x (2005).
- 7 Faris, J. D., Li, W. L., Liu, D. J., Chen, G. D. & Gill, b. S. Candidate gene analysis of quantitative disease resistance in wheat. *Theor Appl Genet* **V98**, 219 (1999).
- 8 Liu, B. *et al.* Candidate defense genes as predictors of quantitative blast resistance in rice. *Mol Plant Microbe Interact* **17**, 1146-1152 (2004).
- 9 Wu, J. L. *et al.* Association between molecular markers and blast resistance in an advanced backcross population of rice. *Theor Appl Genet* **108**, 1024-1032 (2004).
- 10 Carrillo, M. G. C., Goodwin, P. H., Leach, J. E., Leung, H. & Vera Cruz, C. M. Phylogenomic relationships of rice oxalate oxidases to the cupin superfamily and their association with disease resistance QTL. *Rice* **2**, 67-79, doi:10.1007/s12284-009-9024-0 (2009).
- 11 Davidson, R. M. *et al.* Rice germin-like proteins: Allelic diversity and relationships to early stress responses. *Rice* **3**, 43-55, doi:10.1007/s12284-010-9038-7 (2010).
- 12 Manosalva, P. M. *et al.* A germin-like protein gene family functions as a complex quantitative trait locus conferring broad-spectrum disease resistance in rice. *Plant Physiol* **149**, 286-296, doi:10.1104/pp.108.128348 (2009).
- 13 Zheng, B. S. *et al.* Mapping QTLs and candidate genes for rice root traits under different water-supply conditions and comparative analysis across three populations. *Theor Appl Genet* **107**, 1505-1515 (2003).
- 14 Trudel, J., Grenier, J., Potvin, C. & Asselin, A. Several thaumatin-like proteins bind to beta-1,3-glucans. *Plant Physiol* **118**, 1431-1438 (1998).
- 15 Woloshuk, C. P., Meulenhoff, J. S., Sela-Buurlage, M., van den Elzen, P. J. & Cornelissen, B. J. Pathogen-induced proteins with inhibitory activity toward *Phytophthora infestans*. *Plant Cell* **3**, 619-628, doi:10.1105/tpc.3.6.619 (1991).
- 16 Chittoor, J. M., Leach, J. E. & White, F. F. Differential induction of a peroxidase gene family during infection of rice by *Xanthomonas oryzae* pv. *oryzae*. *Mol Plant Microbe Interact* **10**, 861-871 (1997).



- 17 Midoh, N. & Iwata, M. Cloning and characterization of a probenazole-inducible gene for an intracellular pathogenesis-related protein in rice. *Plant Cell Physiol* **37**, 9-18, doi:10.1093/oxfordjournals.pcp.a028918 (1996).
- 18 Temnykh, S. *et al.* Computational and experimental analysis of microsatellites in rice (*Oryza sativa* L.): frequency, length variation, transposon associations, and genetic marker potential. *Genome Res* **11**, 1441-1452, doi:10.1101/gr.184001 (2001).
- 19 Chen, X., Temnykh, S., Xu, Y., Cho, Y. G. & McCouch, S. R. Development of a microsatellite framework map providing genome-wide coverage in rice (*Oryza sativa* L.). *Theor Appl Genet* **95**, 553-567, doi:DOI 10.1007/s001220050596 (1997).
- 20 Panaud, O., Chen, X. & McCouch, S. R. Development of microsatellite markers and characterization of simple sequence length polymorphism (SSLP) in rice (*Oryza sativa* L.). *Mol Gen Genet* **252**, 597-607, doi:10.1007/bf02172406 (1996).
- 21 Temnykh, S. *et al.* Mapping and genome organization of microsatellite sequences in rice (*Oryza sativa* L.). *Theor Appl Genet* **100**, 697-712, doi:DOI 10.1007/s001220051342 (2000).
- 22 Akagi, H., Yokozeki, Y., Inagaki, A. & Fujimura, T. Microsatellite DNA markers for rice chromosomes. *Theor Appl Genet* **93**, 1071-1077, doi:10.1007/BF00230127 (1996).
- 23 McCouch, S. R. *et al.* Development and mapping of 2240 new SSR markers for rice (*Oryza sativa* L.) *DNA Res* **9**, 257-279 (2002).
- 24 Wu, K. S. & Tanksley, S. D. Abundance, polymorphism and genetic mapping of microsatellites in rice. *Mol Gen Genet* **241**, 225-235, doi:10.1007/bf00280220 (1993).
- 25 Eizenga, G. C., Agrama, H. A., Lee, F. N., Yan, W. & Jia, Y. Identifying novel resistance genes in newly introduced blast resistant rice germplasm. *Crop Sci* **46**, 1870-1878, doi:10.2135/cropsci2006.0143 (2006).
- 26 Alam, S. N. & Cohen, M. B. Detection and analysis of QTLs for resistance to the brown planthopper, *Nilaparvata lugens*, in a doubled-haploid rice population. *Theor Appl Genet* **97**, 1370-1379, doi:DOI 10.1007/s001220051031 (1998).
- 27 Kunihiro, Y. *et al.* QTL analysis of sheath blight resistance in rice (*Oryza sativa* L.). *Yi Chuan Xue Bao* **29**, 50-55 (2002).
- 28 Wang, G. L. *et al.* RFLP mapping of genes conferring complete and partial resistance to blast in a durably resistant rice cultivar. *Genetics* **136**, 1421-1434 (1994).
- 29 Han, Y. P. *et al.* Mapping QTLs for horizontal resistance to sheath blight in an elite rice restorer line, Minghui 63. *Yi Chuan Xue Bao* **29**, 622-626 (2002).
- 30 Xing, Z. *et al.* Characterization of the main effects, epistatic effects and their environmental interactions of QTLs on the genetic basis of yield traits in rice. *Theor Appl Genet* **105**, 248-257, doi:10.1007/s00122-002-0952-y (2002).
- 31 Li, Z., Pinson, S. R., Marchetti, M. A., Stansel, J. W. & Park, W. D. Characterization of quantitative trait loci (QTLs) in cultivated rice contributing to field resistance to sheath blight (*Rhizoctonia solani*). *Theor Appl Genet* **91**, 382-388, doi:10.1007/BF00220903 (1995).
- 32 Li, Z. K. *et al.* Are the dominant and recessive plant disease resistance genes similar? A case study of rice R genes and *Xanthomonas oryzae* pv. *oryzae* races. *Genetics* **159**, 757-765 (2001).
- 33 Xu, X. F., Mei, H. W., Luo, L. J., Cheng, X. N. & Li, Z. K. RFLP-facilitated investigation of the quantitative resistance of rice to brown planthopper (*Nilaparvata lugens*). *Theor Appl Genet* **104**, 248-253, doi:10.1007/s00122-001-0777-0 (2002).
